# Supplementary material for: Radiation driven epithelial-mesenchymal transition is mediated by Notch signaling in breast cancer
Source: PubMed Central journal article supplement (PMC5288197; doi:10.18632/oncotarget.10802), 2016-07-23
Supplement: oncotarget-07-53430-s001.pdf [file oncotarget-07-53430-s001.pdf]

## Radiation driven epithelial-mesenchymal transition is mediated by Notch signaling in breast cancer

### Supplementary Materials

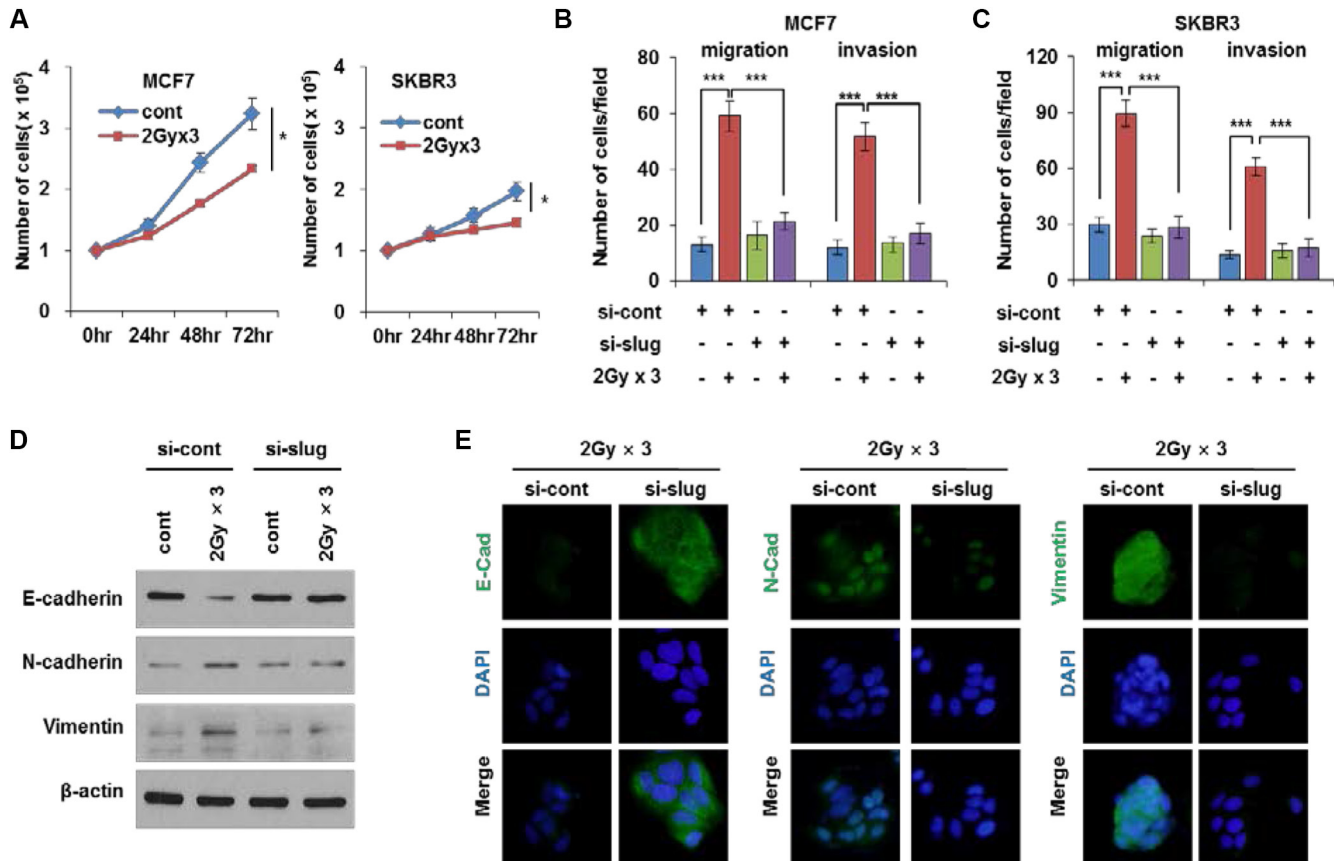

**Supplementary Figure S1: Fractionated radiation promotes EMT of breast cancer cells through SLUG.** (A) Cell growth of MCF7 and SKBR3 cells after fractionated irradiation (2Gy  $\times$  3; 2 Gy/day for 3 days). (B and C) Migration and invasion assay in transwells after fractionated irradiation of MCF7 and SKBR3 cells, respectively, that are transfected with siRNA targeting slug. (D) Western blot for EMT markers such as E-cadherin, N-cadherin and vimentin in irradiated MCF7 breast cancer cells that are transfected with siRNA targeting slug. (E) Immunocytochemistry for EMT markers such as E-cadherin, N-cadherin and vimentin in irradiated MCF7 cells transfected with siRNA targeting slug.  $\beta$ -actin was used as a loading control. Error bars represent mean  $\pm$  S.D. of triplicate samples. \* $p$  < 0.05.

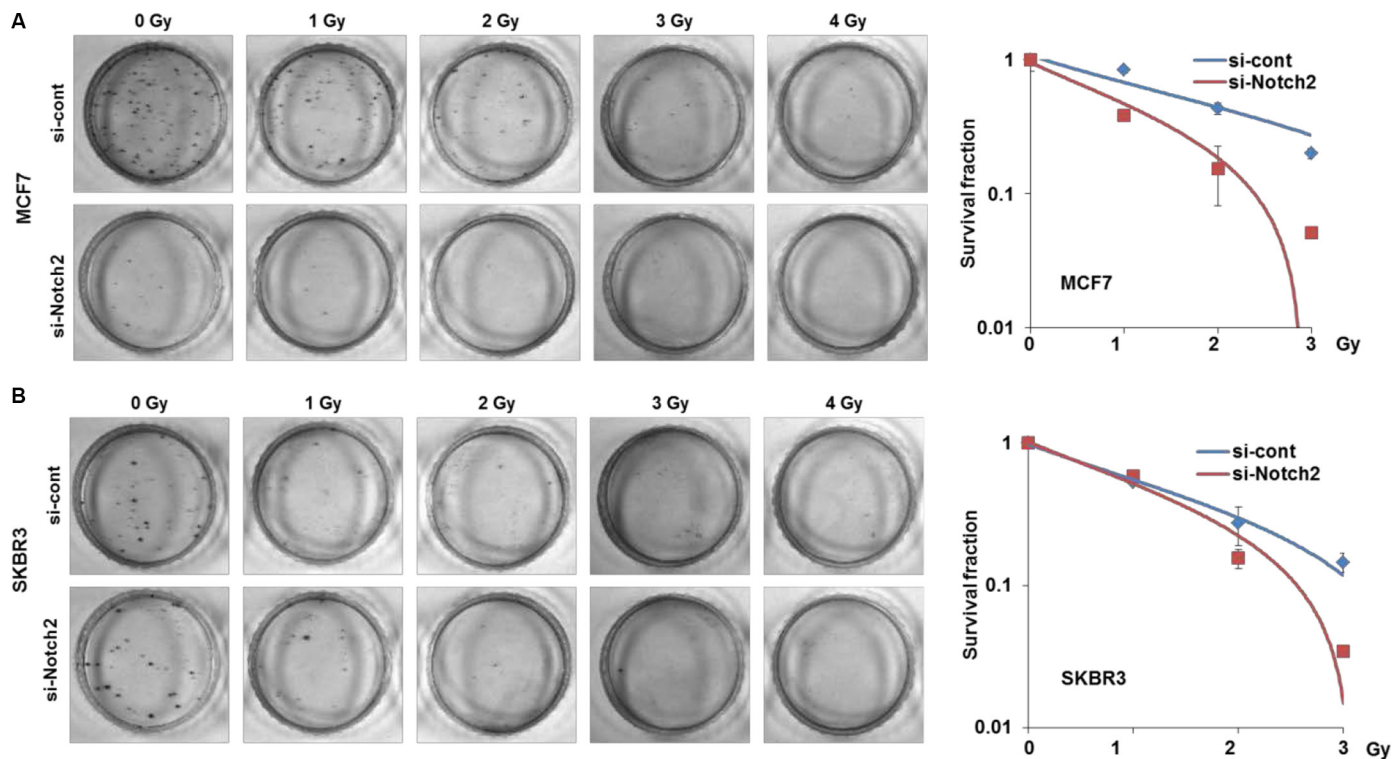

**Supplementary Figure S2: Fractionated radiation-induced Notch2 signaling decreases cell clonogenicity in breast cancer cells.** (A) Clonogenic assay of irradiated (0–4 Gy) MCF7 cells that are transfected with siRNA targeting Notch2. (B) Clonogenic assay of irradiated (0–4 Gy) SKBR3 cells that are transfected with siRNA targeting Notch2.

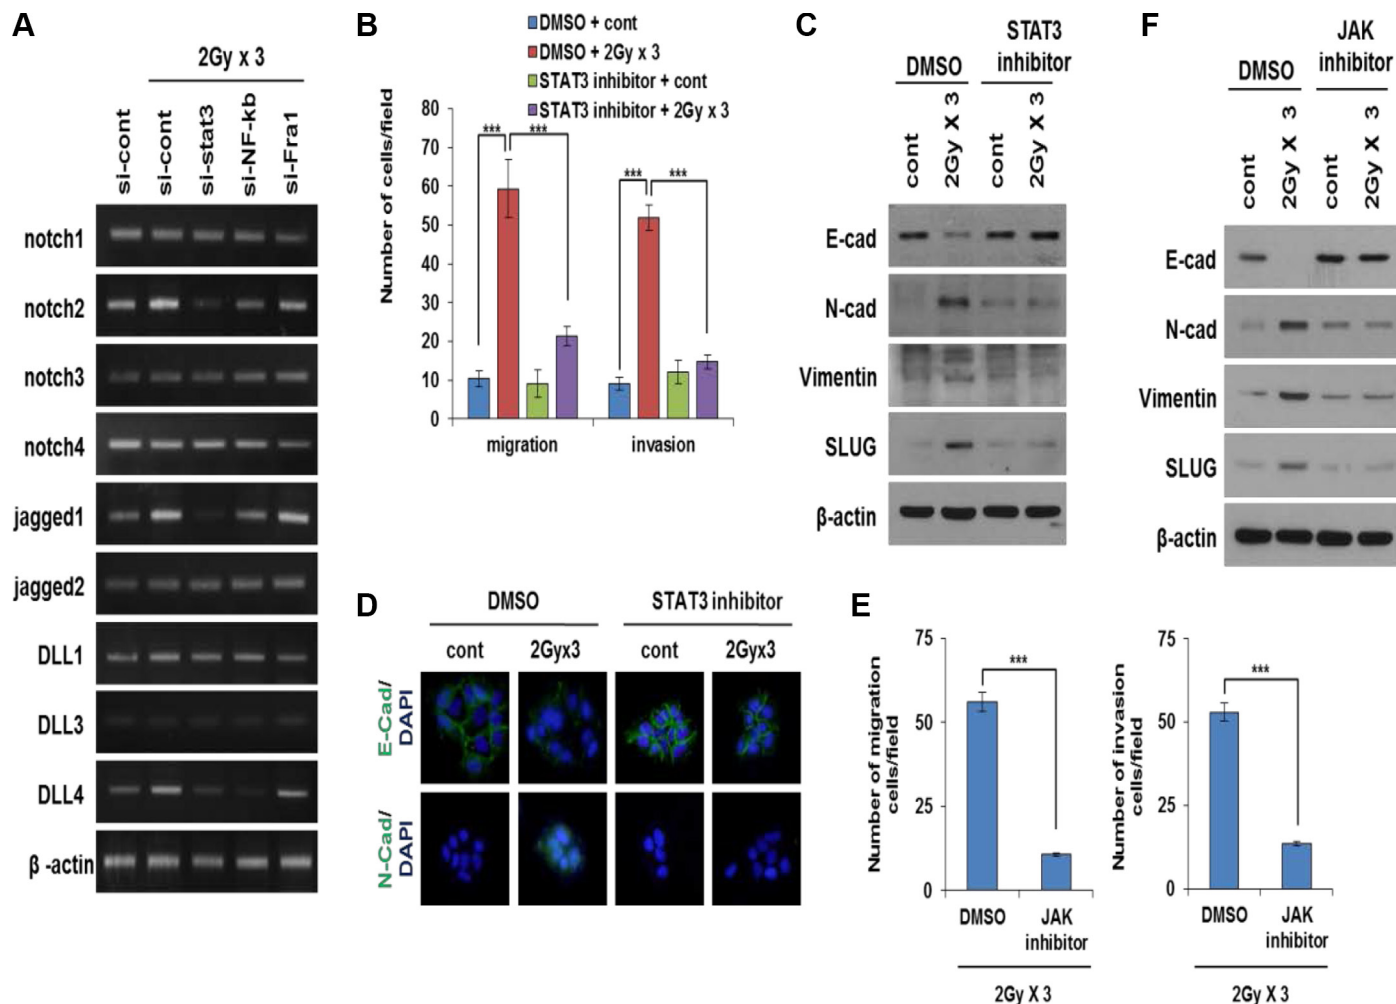

**Supplementary Figure S3: Fractionated radiation-induced JAK/STAT signaling promotes EMT in breast cancer cells.**

(A) PCR analysis for notch family in fractionation-radiated (2 Gy  $\times$  3) MCF7 cells that are transfected with siRNA targeting STAT3, NF- $\kappa$ B and Fra-1. (B) Migration and invasion assay in transwells after irradiation of MCF7 that are treated with STAT3 inhibitor (2  $\mu$ M). (C) Western blot for EMT markers after fractionated irradiation of MCF7 that are treated with STAT3 inhibitor. (D) Immunocytochemistry for EMT markers, E-cadherin in irradiated MCF7 cells that are treated with STAT3 inhibitor (2  $\mu$ M). (E) Migration and invasion assay in transwells after irradiation of MCF7 that are treated with JAK inhibitor (10  $\mu$ M). (F) Western blot for EMT markers after fractionated irradiation of MCF7 that are treated with JAK inhibitor.  $\beta$ -actin was used as a loading control. Error bars represent mean  $\pm$  S.D. of triplicate samples. \*\*\* $p$  < 0.001.

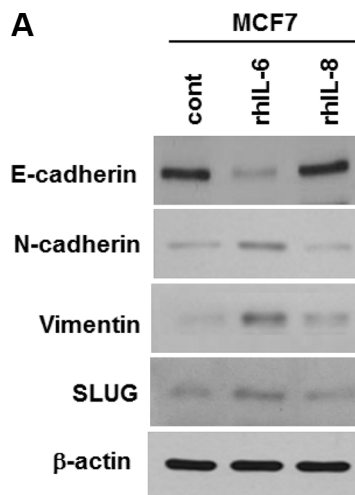

**Supplementary Figure S4: IL-6 regulates the EMT more efficiently than IL-8 in breast cancer cells by fractionated radiation.** (A) Western blot for EMT markers after recombinant IL-6 (0.5 ng/mL) and recombinant IL-8 (2  $\mu$ g/mL) protein in MCF7 cells.  $\beta$ -actin was used as a loading control. Error bars represent mean  $\pm$  S.D. of triplicate samples. \*\* $p$  < 0.01, \*\*\* $p$  < 0.001.

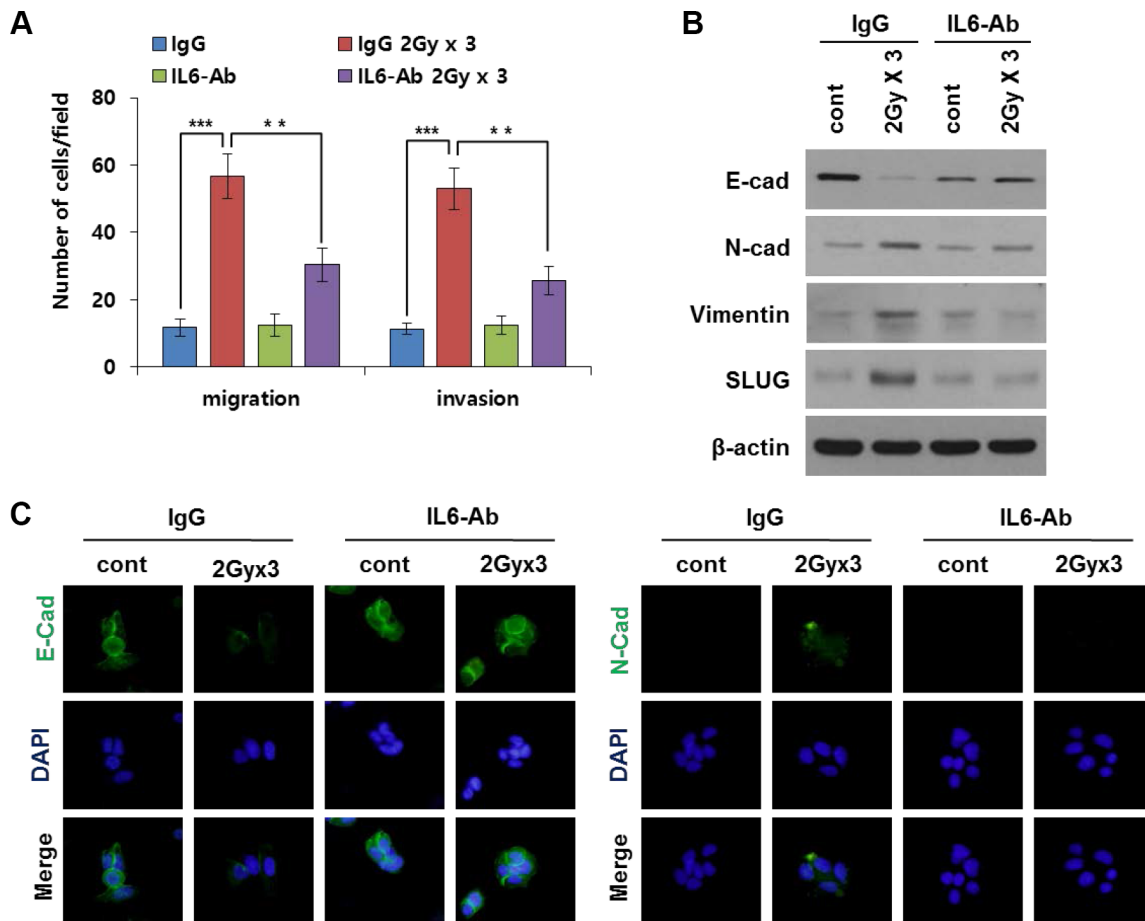

**Supplementary Figure S5: IL-6 regulation the EMT in breast cancer cells by fractionated radiation.** (A) Migration and invasion assay in transwells after irradiation of MCF7 that are treated with IL-6 neutralizing antibody. (B) Western blot and (C) immunocytochemistry for EMT markers after fractionated irradiation of MCF7 that are treated with STAT3 inhibitor.  $\beta$ -actin was used as a loading control. Error bars represent mean  $\pm$  S.D. of triplicate samples.  $**p < 0.01$ ,  $***p < 0.001$ .

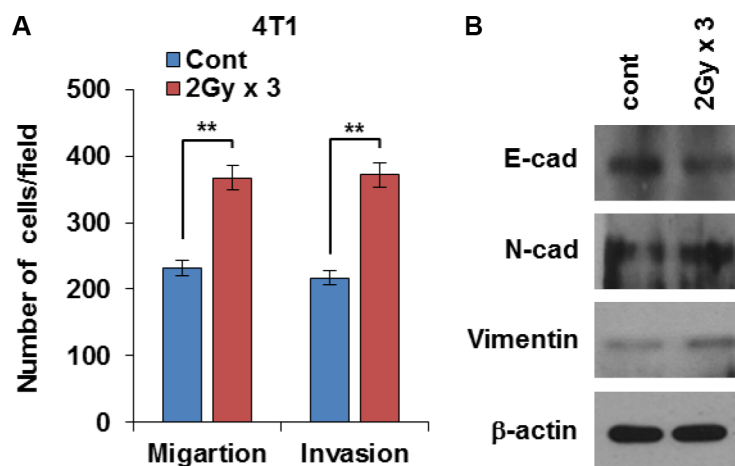

**Supplementary Figure S6: Fractionated radiation induces invasiveness in 4T1 mouse mammary cells.** (A) Migration and invasion assay in transwells after irradiation of 4T1. (B) Western blot for EMT markers after fractionated irradiation of 4T1 cells.  $\beta$ -actin was used as a loading control. Error bars represent mean  $\pm$  S.D. of triplicate samples.  $**p < 0.01$ .
